# Supplementary material
Source: HighWire-hosted journal article supplement (https://bmjopen.bmj.com/content/11/4/e039948)
Supplement: inline-supplementary-material-1 [file inline-supplementary-material-1.pdf]

**Supplementary Table 1. Subgroup Analysis of Income Distribution (by quartile) among Individuals with Increased Income (n=461)**

| Post-Accident    | Non return to work + Job retention (N=0) | Non return to work + Non retention (N=8) |       | Reemployed + Non retention (N=86) |       | Returned to original work + Non retention (N=26) |       | Reemployed + Job retention (N=139) |       | Returned to original work + Job retention (N=202) |       |
|------------------|------------------------------------------|------------------------------------------|-------|-----------------------------------|-------|--------------------------------------------------|-------|------------------------------------|-------|---------------------------------------------------|-------|
|                  |                                          | n                                        | %     | n                                 | %     | n                                                | %     | n                                  | %     | n                                                 | %     |
| Income Quartiles |                                          |                                          |       |                                   |       |                                                  |       |                                    |       |                                                   |       |
| 0-25% (low)      | -                                        | 7                                        | 87.50 | 30                                | 34.88 | 5                                                | 19.23 | 43                                 | 30.94 | 51                                                | 25.25 |
| 25-50%           | -                                        | 0                                        | 0.00  | 26                                | 30.23 | 10                                               | 38.46 | 41                                 | 29.50 | 57                                                | 28.22 |
| 50-75%           | -                                        | 0                                        | 0.00  | 22                                | 25.58 | 7                                                | 26.92 | 40                                 | 28.78 | 54                                                | 26.73 |
| 75-100% (high)   | -                                        | 1                                        | 12.50 | 8                                 | 9.30  | 4                                                | 15.38 | 15                                 | 10.79 | 40                                                | 19.80 |
